# Supplementary material for: An emerging consensus in palaeoanthropology: demography was the main factor responsible for the disappearance of Neanderthals
Source: PubMed Central journal article supplement (PMC7921565; doi:10.1038/s41598-021-84410-7), 2021-03-01
Supplement: 41598_2021_84410_MOESM1_ESM.pdf [file 41598_2021_84410_MOESM1_ESM.pdf]

## SUPPLEMENTARY MATERIALS

### **An emerging consensus in palaeoanthropology: demography was the main factor responsible for the disappearance of Neanderthals**

Krist Vaesen<sup>1,2</sup>, Gerrit L. Dusseldorp<sup>1,3</sup>, Mark J. Brandt<sup>4</sup>

<sup>1</sup> Faculty of Archaeology, Leiden University, The Netherlands

<sup>2</sup> School of Innovation Sciences, Eindhoven University of Technology, The Netherlands

<sup>3</sup> Palaeo-Research Institute, University of Johannesburg, South Africa

<sup>4</sup> Department of Psychology, Michigan State University, U.S.

Corresponding author: [k.vaesen@tue.nl](mailto:k.vaesen@tue.nl)

#### **ORCIDs**

K Vaesen [0000-0002-7496-7463](https://orcid.org/0000-0002-7496-7463)

G Dusseldorp [0000-0001-6147-710X](https://orcid.org/0000-0001-6147-710X)

M Brandt [0000-0002-7185-7031](https://orcid.org/0000-0002-7185-7031)

**SI Table 1: Overview of recently proposed explanations for Neanderthal disappearance**

| <b>Factor</b>      | <b>Sub-factor</b>                                                                                                                                                                                                                               | <b>Exemplars</b>                                      |
|--------------------|-------------------------------------------------------------------------------------------------------------------------------------------------------------------------------------------------------------------------------------------------|-------------------------------------------------------|
| <b>Morphology</b>  | Neanderthals' shorter lower limbs lead to increased cost of locomotion compared to AMHs; potentially leads to competitive disadvantage in mobility organisation and exploitation of spatially dispersed resources                               | Studel-Numbers 2004                                   |
|                    | Neanderthal calcaneus points to foot structure less suited to endurance running than AMHs; potentially leads to competitive disadvantage in mobility organisation and hunting strategies                                                        | Raichlen et al. 2011                                  |
|                    | Neanderthals were adapted to "power locomotion" in rugged, bushy terrain. They were at a disadvantage in increasingly open landscapes.                                                                                                          | Stewart et al. 2019; Bastir et al. 2020               |
|                    | High energetic requirements led to smaller population sizes than AMHs in similar circumstances; also led to longer inter-birth intervals, meaning slower recovery from population crashes and slower re-colonization of depopulated areas.      | Sorensen and Leonard 2001; Froehle and Churchill 2009 |
| <b>Cognition</b>   | Lower working memory in Neanderthals leads to less frequent innovation, less ability in cost-benefit analysis                                                                                                                                   | Wynn and Coolidge 2004                                |
|                    | Neanderthals have sophisticated domain-specific intelligence, but domains not well-integrated, hence                                                                                                                                            | Mithen 1996; 1999                                     |
|                    | Limited capacities for symbolic communication including language compared to AMHs                                                                                                                                                               | Mellars 2004                                          |
|                    | Limited linguistic capabilities compared to AMHs                                                                                                                                                                                                | Bolhuis et al. 2014; Berwick and Chomsky 2017         |
|                    | Neanderthals had larger orbits, adaptation to lower light levels. In conjunction larger part of the neocortex was taken up by visual system leaving less processing capacity for social cognition putting them at disadvantage compared to AMHs | Pearce et al. 2013                                    |
|                    | AMHs increased spatial cognition and extensive networks aids rapid dispersal and colonization and relatively greater evolutionary success of modern humans over Neanderthals                                                                    | Burke 2012                                            |
|                    | Brain anatomy: relatively smaller cerebellum in Neanderthals led them to have less information processing capacity than AMHs                                                                                                                    | Kochiyama et al. 2018                                 |
| <b>Environment</b> | Climatic instability leading to depopulation of regions by Neanderthals clears the way for AMH colonization before Neanderthal populations rebounded                                                                                            | Müller et al. 2011                                    |
|                    | Modelling of ecological niches of Neanderthals and AMHs suggests the area suitable for both species declined in late MIS 3, but area suitable for Neanderthals was more fragmented making their populations more vulnerable                     | Finlayson and Carrión 2007; Melchionna et al. 2018    |
|                    | Succession of cold, arid events led to Neanderthal depopulation of areas and AMH recolonisation                                                                                                                                                 | Staubwasser et al. 2018                               |
|                    | Neanderthals exposed to new pathogens to which AMHs had already built up resistance.                                                                                                                                                            | Houldcroft and Underdown 2016; Greenbaum et al. 2019  |
|                    | Volcanic eruptions in Italy and Caucasus leading to environmental deterioration may have led to Neanderthal local extinctions and AMH recolonization                                                                                            | Golovanova et al. 2010                                |

|                   |                                                                                                                                                                                                                                                                                                            |                                                |
|-------------------|------------------------------------------------------------------------------------------------------------------------------------------------------------------------------------------------------------------------------------------------------------------------------------------------------------|------------------------------------------------|
| <b>Technology</b> | Neanderthals likely did not use tailored cold-weather clothing, in contrast to AMH giving the latter competitive advantage                                                                                                                                                                                 | Collard et al. 2016                            |
|                   | Neanderthals did not produce projectile weapons while AMH did                                                                                                                                                                                                                                              | Shea and Sisk 2010                             |
|                   | Neanderthals were unable to make fire at will, only “harvested” naturally occurring fire                                                                                                                                                                                                                   | Dibble et al. 2018                             |
|                   | Different spatial structure of sites, reflecting different social organisation; no dwelling constructions may be disadvantageous in the cold                                                                                                                                                               | Kolen 1999; Chu 2009                           |
|                   | Neanderthal prepared core knapping strategies led to less useful debitage products than AMH blade and bladelet production from same quantity of raw material                                                                                                                                               | Bar-Yosef & Kuhn 1999; Muller and Shipton 2016 |
| <b>Economy</b>    | Less exploitation of small, fast-moving prey through e.g. trapping by Neanderthals gives competitive advantage to AMH who have more biomass at their disposal. Due to high reproductive rate, small mammals and birds also more resilient to over-exploitation and rebound faster from population crashes. | Stiner and Kuhn 2006                           |
|                   | Less exploitation of aquatic resources than AMH gives competitive advantage to the latter                                                                                                                                                                                                                  | Richards et al. 2001<br>Marean 2014            |
|                   | Less effective resource exploitation than AMH gives competitive advantage to the latter                                                                                                                                                                                                                    | Timmermann 2020                                |
|                   | Less effective resource exploitation than AMH gives competitive advantage to the latter<br>Outcompeted by AMH groups hunting with domestic dogs, which greatly increases hunting activities                                                                                                                | Shipman 2015                                   |
| <b>Social</b>     | Less trade between groups leads to less efficient exploitation and less options to buffer scarcity                                                                                                                                                                                                         | Horan et al. 2005                              |
|                   | Inter-group alliances limited compared to AMH, as demonstrated by absence/rarity of evidence for long-distance exchange of materials, who were thus better to deal with adverse conditions                                                                                                                 | Gamble 1999                                    |
| <b>Demography</b> | Small-group size (and limited intergroup contact due to low population density), lead to dearth of suitable mating partners resulting in frequent episodes of inbreeding and allee effect, depressing fitness                                                                                              | Vaesen et al. 2019; Sikora et al. 2017         |
|                   | Numerical supremacy: 10-fold larger population density of AMH compared to Neanderthals, important competitive factor                                                                                                                                                                                       | Mellars and French 2011                        |
|                   | Higher mortality/lower life expectancy than AMH                                                                                                                                                                                                                                                            | Ramirez-Rossi and Bermudez de Castro 2004      |
|                   | Higher energetic needs compared to AMH led to longer inter-birth interval, lower offspring survivorship among Neanderthals                                                                                                                                                                                 | Froehle and Churchill 2009                     |

## References

- Bar-Yosef, O. & Kuhn, S. L. The big deal about blades: laminar technologies and human evolution. *Am. Anthropol.* 101(2), 322–338 (1999).
- Bastir, M. et al. Rib cage anatomy in *Homo erectus* suggests a recent evolutionary origin of modern human body shape. *Nat. Ecol. Evol.* 4(9), 1178–1187 (2020).
- Bruner, E. et al. Cognitive archeology, body cognition, and hand–tool interaction. *Prog. Brain Res.* 238, 325–345 (2018).
- Burke, A. Spatial abilities, cognition and the pattern of Neanderthal and modern human dispersals. *Quat. Int.* 247, 230–235 (2012).
- Chu, W. A functional approach to Paleolithic open-air habitation structures. *World Archaeol.* 41(3), 348–362 (2009).
- Dibble, H. L. et al. Were Western European Neanderthals able to make fire?. *J. Palaeolithic Archaeol.* 1, 54–79 (2018).
- Eren, M. I., Greenspan, A. & Sampson, C. G. Are Upper Palaeolithic blade cores more productive than Middle Palaeolithic discoidal cores? A replication experiment. *J. Hum. Evol.* 55(6), 952–961 (2008).
- Finlayson, C. & Carrion, J. Rapid ecological turnover and its impact on Neanderthal and other human populations. *Trends Ecol. Evol.* 22(4), 213–222 (2007).
- Froehle, A. W. & Churchill, S. E. Energetic competition between Neandertals and anatomically modern humans. *Palaeoanthropology* 96, 119 (2009).
- Harari, Y. N. *Sapiens: A Brief History of Humankind* (Harper Collins, New York, 2014).
- Klein, R. G. *The Human Career* 3rd edn. (The University Of Chicago Press, Chicago, 2009).
- Kolen, J. Hominids without homes: on the nature of Middle Palaeolithic settlement in Europe. The Middle Palaeolithic of Europe. In *The Middle Palaeolithic Occupation of Europe* (eds Roebroeks, W. & Gamble, C.) 139–175 (Leiden University Press, Leiden, 1999).
- Longrich NR (2020) Did Neanderthals go to war with our ancestors? BBC Future. <https://www.bbc.com/future/article/20201102-did-neanderthals-go-to-war-with-our-ancestors>.
- Lowe, J. et al. Volcanic ash layers illuminate the resilience of Neanderthals and early modern humans to natural hazards. *Proc. Natl. Acad. Sci.* 109(34), 13532 (2012).
- McBrearty, S. & Brooks, A. S. The revolution that wasn't: a new interpretation of the origin of modern human behavior. *J. Hum. Evol.* 39, 453–563 (2000).
- Melchionna, M. et al. Fragmentation of Neanderthals' pre-extinction distribution by climate change. *Palaeogeogr. Palaeoclimatol. Palaeoecol.* 496, 146–154 (2018).
- Mellars, P. Neanderthals and the modern human colonization of Europe. *Nature* 432, 461–465 (2004).
- Mithen, S. J. Domain-specific intelligence and the Neanderthal mind. In *Modelling the Early Human Mind* (eds Mellars, P. & Gibson, K.) 217–229 (Oxbow Books, Oxford, 1996).
- Mithen, S. J. *The Prehistory of the Mind: The Cognitive Origins of Art, Religion and Science* (Thames & Hudson, London, 1999).
- Muller, A. & Clarkson, C. Identifying major transitions in the evolution of lithic cutting edge production rates. *PLoS ONE* 11(12), 0167244 (2016).

- Pereira-Pedro, A. S., Bruner, E., Gunz, P. & Neubauer, S. A morphometric comparison of the parietal lobe in modern humans and Neanderthals. *J. Hum. Evol.* 142, 102770 (2020).
- Raichlen, D. A., Armstrong, H. & Lieberman, D. E. Calcaneus length determines running economy: implications for endurance running performance in modern humans and Neanderthals. *J. Hum. Evol.* 60(3), 299–308 (2011).
- Ramirez-Rozzi, F. V. & Bermudez de Castro, J. M. Surprisingly rapid growth in Neanderthals. *Nature* 428, 936–939 (2004).
- Richards, M. P. et al. Stable isotope evidence for increasing dietary breadth in the European mid-Upper Palaeolithic. *Proc. Natl. Acad. Sci.* 98(11), 6528–6532 (2001).
- Roebroeks, W. & Villa, P. On the earliest evidence for habitual use of fire in Europe. *Proc. Natl. Acad. Sci.* 108(13), 5209–5214 (2011).
- Shipman, P. *The Invaders: How Humans and Their Dogs Drove Neanderthals to Extinction* (Belknap Press of Harvard University Press, Cambridge, 2015).
- Sorensen, A. C. On the relationship between climate and Neanderthal fire use during the Last Glacial in south-west France. *Quat. Int.* 436, 114–128 (2017).
- Sorensen, M. V. & Leonard, W. R. Neanderthal energetics and foraging efficiency. *J. Hum. Evol.* 40, 483–495 (2001).
- Staubwasser, M. et al. Impact of climate change on the transition of Neanderthals to modern humans in Europe. *Proc. Natl. Acad. Sci.* 115(37), 9116–9121 (2018).
- Stewart, J. R. et al. Palaeoecological and genetic evidence for Neanderthal power locomotion as an adaptation to a woodland environment. *Quat. Sci. Rev.* 217, 310–315 (2019).
- Timmermann, A. Quantifying the potential causes of Neanderthal extinction: Abrupt climate change versus competition and interbreeding. *Quat. Sci. Rev.* 238, 106331 (2020).
- Traynor, S., Gurtov, A. N., Senjem, J. H. & Hawks, J. Assessing eye orbits as predictors of Neanderthal group size. *Am. J. Phys. Anthropol.* 157(4), 680–683 (2015).
- Trinkaus, E. Late Pleistocene adult mortality patterns and modern human establishment. *Proc. Natl. Acad. Sci.* 108(4), 1267–1271 (2011).
- Underdown, S. A potential role for transmissible spongiform encephalopathies in Neanderthal extinction. *Med. Hypotheses* 71(1), 4–7 (2008).
- Wynn, T. & Coolidge, F. L. The expert Neanderthal mind. *J. Hum. Evol.* 46(4), 467–487 (2004).
- Zilhão, J. et al. Last interglacial Iberian Neanderthals as fisher–hunter–gatherers. *Science* 367(6485), 7943 (2020).

**SI Table 2: “Other factors” responses coming out of the survey**

| Response                                                                       | Categorization | Secondary categorization |
|--------------------------------------------------------------------------------|----------------|--------------------------|
| smaller bodies are cheaper to run                                              | COMP           |                          |
| Rate of cultural innovation (due to larger pop size)                           | COMP           | DEM                      |
| lower dietary intake; better able to survive famine                            | COMP           |                          |
| Cognitive metaplasticity and behavioral flexibility                            | COMP           |                          |
| language                                                                       | COMP           |                          |
| Broader range of ecological niches (or maybe that's just economic)             | COMP           |                          |
| Adaptability to new niches                                                     | COMP           |                          |
| Energetics and physiological demands                                           | COMP           |                          |
| Body type more efficient for covering large distances                          | COMP           |                          |
| versatility                                                                    | COMP           |                          |
| social issues                                                                  | COMP           | DEM                      |
| Adapted to a variety of environments                                           | COMP           | ENV                      |
| More agresivity? Higher carrying capacity due to wider range of food sources?  | COMP           |                          |
| Ecological plasticity                                                          | COMP           |                          |
| Networks and mobility                                                          | COMP           |                          |
| rapid adaptive response to climatic changes                                    | COMP           |                          |
| complex clothing                                                               | COMP           |                          |
| Environmental plasticity/versatility                                           | COMP           | ENV                      |
| Advantages in communication, socially adquired                                 | COMP           |                          |
| seamed clothing                                                                | COMP           |                          |
| racism                                                                         | COMP           |                          |
| tradition                                                                      | COMP           |                          |
| Adaptability                                                                   | COMP           |                          |
| diet breadth                                                                   | COMP           |                          |
| energetics, body mass, and body proportions                                    | COMP           |                          |
| Lower calroic requirement for AMH (morphological advantage?)                   |                |                          |
| making it easier to support more individuals.                                  | COMP           |                          |
| Cultural adaptations to new environments                                       | COMP           |                          |
| presence of other hominins                                                     | COMP           |                          |
| niche construction                                                             | COMP           |                          |
| Intensive orientation along river courses                                      | COMP           |                          |
| Landscape modifications                                                        | COMP           |                          |
| The encounter of new population in unknown terrain                             | COMP           |                          |
| networking and interaction between fragmented, isolated local populations      | COMP           |                          |
| competition with other hominids                                                | COMP           |                          |
| competition with other hominins                                                | COMP           |                          |
| cultural                                                                       | COMP           |                          |
| food - climate                                                                 | COMP           |                          |
| Genetic resistance to diseases                                                 | COMP           |                          |
| out-competed by H. sapiens                                                     | COMP           |                          |
| recurrent population pressure on big game resources in key regions (eg Levant) | COMP           |                          |

|                                                                                                                                             |      |      |
|---------------------------------------------------------------------------------------------------------------------------------------------|------|------|
| Securing sufficient calories                                                                                                                | COMP |      |
| demography                                                                                                                                  | DEM  |      |
| Population size (linked to economic)                                                                                                        | DEM  |      |
| birth intervals, mobility, family size                                                                                                      | DEM  |      |
| demographic ones                                                                                                                            | DEM  |      |
| Social group size                                                                                                                           | DEM  |      |
| Demography                                                                                                                                  | DEM  |      |
| Population size                                                                                                                             | DEM  |      |
| population size                                                                                                                             | DEM  |      |
| wider distribution e.g. Africa                                                                                                              | DEM  |      |
| more number birth                                                                                                                           | DEM  |      |
| Increases in birth rates                                                                                                                    | DEM  |      |
| greater AMH population size and territory in Africa                                                                                         | DEM  |      |
| numbers                                                                                                                                     | DEM  |      |
| Pop size                                                                                                                                    | DEM  |      |
| Group size                                                                                                                                  | DEM  | COMP |
| Swamping of population by southern migrates in part due to Family size and birth intervals                                                  | DEM  |      |
| Child mortality (illness related)                                                                                                           | DEM  |      |
| demographic isolation                                                                                                                       | DEM  |      |
| geographic distance                                                                                                                         | DEM  |      |
| geographic isolation                                                                                                                        | DEM  |      |
| group isolation                                                                                                                             | DEM  |      |
| group size                                                                                                                                  | DEM  |      |
| Group size                                                                                                                                  | DEM  |      |
| High adult mortality                                                                                                                        | DEM  |      |
| isolation of groups                                                                                                                         | DEM  |      |
| Metapopulation structure                                                                                                                    | DEM  |      |
| Mortality rates                                                                                                                             | DEM  |      |
| Population distribution                                                                                                                     | DEM  |      |
| reproductive rates and pregnancy duration                                                                                                   | DEM  |      |
| resorbed back into main Homo sapiens population via interbreeding                                                                           | DEM  |      |
| The conductivity bwtween sub populations                                                                                                    | DEM  |      |
| disease resistance                                                                                                                          | ENV  |      |
| Geographical location of refugia during climate downturns; and difference in mobility systems                                               | ENV  |      |
| local catastrophic events                                                                                                                   | ENV  |      |
| VULCANISM                                                                                                                                   | ENV  |      |
| environmental fluctuations                                                                                                                  | ENV  |      |
| animal migrations                                                                                                                           | ENV  |      |
| volcanos eruption 40.000 ka which affected Europe                                                                                           | ENV  |      |
| Natural disasters                                                                                                                           | ENV  |      |
| Short and fast environmental changes could lead to competition on territories in Neanderthal populations prior to AMHs appearence in Europe | ENV  |      |
| Cold                                                                                                                                        | ENV  |      |
| Changes in resource availability                                                                                                            | ENV  |      |
| change of food                                                                                                                              | ENV  |      |

|                                                                       |       |
|-----------------------------------------------------------------------|-------|
| vulcano eruption CI                                                   | ENV   |
| Diseases                                                              | ENV   |
| immune system/ infections                                             | ENV   |
| Introduced diseases                                                   | ENV   |
| Lowering of carrying capacity, due to food shrtening (e,g, big preys) | ENV   |
| Genetically swamped                                                   | Other |
| genetic dilution by AMH                                               | Other |
| Timing fluctuations                                                   | Other |
| The environment had little to nothing to do with Neandertals          |       |
| disappearance                                                         | Other |
| luck?                                                                 | Other |



**SI Table 3: Advantages of Neanderthals over AMHs**

| <b>Response</b>                                                                                                                  | <b>Categorization</b> |
|----------------------------------------------------------------------------------------------------------------------------------|-----------------------|
| tougher and stronger (brawn versus brain)                                                                                        | COMP                  |
| Longer term occupation of Eurasia, thus greater familiarity with ecology, animal behavior, environment, climate, landscape, etc. | COMP                  |
| local knowledge                                                                                                                  | COMP                  |
| Long lasting the glacial periods                                                                                                 | COMP                  |
| morphology, immunity and different cognition                                                                                     | COMP                  |
| Body type better adapter to cold                                                                                                 | COMP                  |
| cold adapted                                                                                                                     | COMP                  |
| Physiological adaptations to northern climates                                                                                   | COMP                  |
| Probably able to exist better in colder climates with unpredictable resources                                                    | COMP                  |
| Strength, some immunity                                                                                                          | COMP                  |
| adapted phenotype, "local" knowledge                                                                                             | COMP                  |
| Adapted to colder environments                                                                                                   | COMP                  |
| Adaptation to overcome local constraints                                                                                         | COMP                  |
| Physical adaptation to Europe                                                                                                    | COMP                  |
| Adaptation to cold environment                                                                                                   | COMP                  |
| physiological cold adaptation                                                                                                    | COMP                  |
| cold tolerance                                                                                                                   | COMP                  |
| Long-term adaptation to Pleistocene Europe                                                                                       | COMP                  |
| experience with strong seasonality                                                                                               | COMP                  |
| Landscape knowledge                                                                                                              | COMP                  |
| Robusticity (physical, stamina)                                                                                                  | COMP                  |
| adaption to local environments                                                                                                   | COMP                  |
| Knowledge of the territory                                                                                                       | COMP                  |
| Adaptation to cold                                                                                                               | COMP                  |
| knowledge of the context                                                                                                         | COMP                  |
| local knowledge of environment/habitat; physical strength                                                                        | COMP                  |
| Adaptation to cold                                                                                                               | COMP                  |
| hundreds of thousands of years of adaptation to Eurasia                                                                          | COMP                  |
| experience                                                                                                                       | COMP                  |
| longer experience in seasonal, Pleistocene landscapes                                                                            | COMP                  |
| Intrinsic resistance to cold                                                                                                     | COMP                  |
| local environment adaptations to Europe                                                                                          | COMP                  |
| familiarity with landscape                                                                                                       | COMP                  |
| adaptation                                                                                                                       | COMP                  |
| possibly greater propensity to cooperate, delay consumption, transport richer resources over longer distances to camp            | COMP                  |
| knowledge of local environments                                                                                                  | COMP                  |
| Local physiological adaptations.                                                                                                 | COMP                  |
| Climatic adaptations                                                                                                             | COMP                  |
| Different mating strategies?                                                                                                     | DEM                   |

**Full questionnaire  
(including consent form)**

# Neanderthals 1

## Survey Flow

**EmbeddedData**

sValue will be set from Panel or URL.

**Block: consent (3 Questions)**

**Branch: New Branch**

**If**

**If Consent If you consent to participate in this study, please click "I agree to participate". If yo... I do not agree to participate Is Selected**

**EndSurvey:**

**Standard: intro (1 Question)**

**Standard: Neanderthals Opinions (5 Questions)**

**Standard: Neanderthals Actions (9 Questions)**

**Standard: climate chnage (1 Question)**

**Standard: Social dominance orientation (2 Questions)**

**Standard: Speciesism (1 Question)**

**Standard: demographics (11 Questions)**

**Standard: End (1 Question)**

Page Break

---

---

**Start of Block: consent**

repeat

This study aims to assess the status of the ongoing debate about the replacement of Neanderthals by Anatomically Modern Humans, and to assess palaeolithic archaeologists' opinions about a couple of other, societally relevant issues. It is being conducted by Gerrit Dusseldorp (Leiden University, Faculty of Archaeology), Krist Vaesen (Leiden University, Faculty of Archaeology), and Mark Brandt (Tilburg University, School of Social and Behavioral Sciences).

**We have advertised this study in multiple locations.**

**Please only take it once. Thank you!**

If you have not taken the study before, please click the button below to start the study.

---

Page Break

---

consent1

**Study Title: Attitudes and Opinions about Neanderthals and Anatomically Modern Humans**

**Consent to Participate in Research**

**Description** This is a survey study. In the study we are interested in your opinion on the replacement of Neanderthals by Anatomically Modern Humans. Further, we would like to know your opinion on a couple of other issues relevant to yourself and society. You will also be asked to answer some demographic questions. It will take 5-10 minutes of your time.

**Benefits** This study will contribute to Palaeolithic archaeology's disciplinary self-understanding. Accordingly, as a researcher within Palaeolithic archaeology (broadly conceived), you may benefit from the results of this study. You will not be paid for your participation. Still, at the end of the questionnaire, you may decide to sign up for a lottery and stand a chance to win a \$500 gift certificate for an ancient DNA test or an Amazon voucher.

**Risks/Discomforts** There is a very small risk that, given the nature of the questions you will be asked, you may become uncomfortable. If at any point during the study proceedings you become uncomfortable, you may elect to withdraw your consent to participate without consequences to you. To withdraw your consent, simply close this browser window. If any feelings of discomfort emerge, you are free to contact the lead investigator with any questions or concerns using the email address listed at the bottom of this consent form.

**Confidentiality** All of the information that we obtain from your session is confidential. We will NOT collect any personal data from which you could be identified (e.g., your name, address, email etc). The data we collect for this study may be made available to researchers via accessible data repositories and possibly used for novel academic purposes. The anonymized data will be stored for at least 10 years.

If you choose to enter the lottery, we will ask for your email address, this email address will be stored separately and will not be linked in any way to the contents of the survey, will never be shared, and will be destroyed as soon as the lottery is finished.

**Voluntary Nature of Participation** Your decision to participate in this study is completely voluntary. Thus, you may refuse to join the study or terminate your participation at any time without any consequences. Should you wish to terminate your participation at any point, you only need to close the browser window.

**Contact Information** If you have any questions or concerns about this study, you may contact the lead investigator of this study: Gerrit Dusseldorp at [g.i.dusseldorp@arch.leidenuniv.nl](mailto:g.i.dusseldorp@arch.leidenuniv.nl). The study was approved by the Ethics Committee of the Faculty of Humanities and Faculty of Archaeology of Leiden University. If you have any remarks or complaints regarding this research, you may also contact the Ethics Committee via [ethics@hum.leidenuniv.nl](mailto:ethics@hum.leidenuniv.nl).

---

consent2 **Consent** If you consent to participate in this study, please click "I agree to participate". If you do not consent to participate, please close the browser window.

- I agree to participate (1)
- I do not agree to participate (2)

End of Block: consent

---

Start of Block: intro

intro Thank you for participating in our study! We appreciate your time.

In this study we are interested in your opinion on the disappearance of the Neanderthal phenotype. Further, we would like to know your opinion on a couple of other issues relevant to yourself and society.

On the next 6 pages, you will complete short measures asking about these issues, as well as questions related to your demographics and background.

End of Block: intro

---

Start of Block: Neanderthals Opinions

neaderintro We would like to know your opinion on the disappearance of the Neanderthal phenotype.

Below you will find a list of factors that might have contributed to this disappearance.

For each factor, please provide your estimate of the strength of the factor's contribution. (0 - no contribution; 6 - strong contribution; don't know)

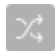

demo *Demographic factors pertaining to Neanderthal populations*

|                                                                                     | 0<br>no<br>contribution<br>(1) | 1 (2)                 | 2 (3)                 | 3 (4)                 | 4 (5)                 | 5 (6)                 | 6<br>strong<br>contribution<br>(7) | don't<br>know<br>(8)  |
|-------------------------------------------------------------------------------------|--------------------------------|-----------------------|-----------------------|-----------------------|-----------------------|-----------------------|------------------------------------|-----------------------|
| Inbreeding<br>(1)                                                                   | <input type="radio"/>          | <input type="radio"/> | <input type="radio"/> | <input type="radio"/> | <input type="radio"/> | <input type="radio"/> | <input type="radio"/>              | <input type="radio"/> |
| Stochasticity<br>(random<br>fluctuations<br>in birth and<br>mortality<br>rates) (2) | <input type="radio"/>          | <input type="radio"/> | <input type="radio"/> | <input type="radio"/> | <input type="radio"/> | <input type="radio"/> | <input type="radio"/>              | <input type="radio"/> |
| Population<br>size (3)                                                              | <input type="radio"/>          | <input type="radio"/> | <input type="radio"/> | <input type="radio"/> | <input type="radio"/> | <input type="radio"/> | <input type="radio"/>              | <input type="radio"/> |
| Allee effects<br>(problems of<br>mate-<br>finding) (4)                              | <input type="radio"/>          | <input type="radio"/> | <input type="radio"/> | <input type="radio"/> | <input type="radio"/> | <input type="radio"/> | <input type="radio"/>              | <input type="radio"/> |
| Other<br>demographic<br>factors                                                     | <input type="radio"/>          | <input type="radio"/> | <input type="radio"/> | <input type="radio"/> | <input type="radio"/> | <input type="radio"/> | <input type="radio"/>              | <input type="radio"/> |

(which ones?) (5)

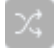

comp Factors pertaining to (in)direct competition with Anatomically Modern Humans (AMHs)

|                                                                | 0<br>no<br>contribution<br>(1) | 1 (2)                 | 2 (3)                 | 3 (4)                 | 4 (5)                 | 5 (6)                 | 6<br>strong<br>contribution<br>(7) | don't<br>know<br>(8)  |
|----------------------------------------------------------------|--------------------------------|-----------------------|-----------------------|-----------------------|-----------------------|-----------------------|------------------------------------|-----------------------|
| Cognitive advantage(s) of AMHs over Neanderthals (1)           | <input type="radio"/>          | <input type="radio"/> | <input type="radio"/> | <input type="radio"/> | <input type="radio"/> | <input type="radio"/> | <input type="radio"/>              | <input type="radio"/> |
| Technological advantage(s) of AMHs over Neanderthals (2)       | <input type="radio"/>          | <input type="radio"/> | <input type="radio"/> | <input type="radio"/> | <input type="radio"/> | <input type="radio"/> | <input type="radio"/>              | <input type="radio"/> |
| Social advantage(s) of AMHs over Neanderthals (3)              | <input type="radio"/>          | <input type="radio"/> | <input type="radio"/> | <input type="radio"/> | <input type="radio"/> | <input type="radio"/> | <input type="radio"/>              | <input type="radio"/> |
| Economic advantage(s) of AMHs over Neanderthals (4)            | <input type="radio"/>          | <input type="radio"/> | <input type="radio"/> | <input type="radio"/> | <input type="radio"/> | <input type="radio"/> | <input type="radio"/>              | <input type="radio"/> |
| Morphological advantage(s) of AMHs over Neanderthals (5)       | <input type="radio"/>          | <input type="radio"/> | <input type="radio"/> | <input type="radio"/> | <input type="radio"/> | <input type="radio"/> | <input type="radio"/>              | <input type="radio"/> |
| Other advantage(s) of AMHs over Neanderthals (which ones?) (6) | <input type="radio"/>          | <input type="radio"/> | <input type="radio"/> | <input type="radio"/> | <input type="radio"/> | <input type="radio"/> | <input type="radio"/>              | <input type="radio"/> |
| Advantages of Neanderthals over AMHs (which ones?) (7)         | <input type="radio"/>          | <input type="radio"/> | <input type="radio"/> | <input type="radio"/> | <input type="radio"/> | <input type="radio"/> | <input type="radio"/>              | <input type="radio"/> |

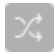

environ *Environmental factors affecting Neanderthal populations*

|                                               | 0<br>no<br>contribution<br>(1) | 1 (2)                 | 2 (3)                 | 3 (4)                 | 4 (5)                 | 5 (6)                 | 6<br>strong<br>contribution<br>(7) | don't<br>know<br>(8)  |
|-----------------------------------------------|--------------------------------|-----------------------|-----------------------|-----------------------|-----------------------|-----------------------|------------------------------------|-----------------------|
| Climatic factors (1)                          | <input type="radio"/>          | <input type="radio"/> | <input type="radio"/> | <input type="radio"/> | <input type="radio"/> | <input type="radio"/> | <input type="radio"/>              | <input type="radio"/> |
| Epidemics (2)                                 | <input type="radio"/>          | <input type="radio"/> | <input type="radio"/> | <input type="radio"/> | <input type="radio"/> | <input type="radio"/> | <input type="radio"/>              | <input type="radio"/> |
| Other environmental factors (which ones?) (3) | <input type="radio"/>          | <input type="radio"/> | <input type="radio"/> | <input type="radio"/> | <input type="radio"/> | <input type="radio"/> | <input type="radio"/>              | <input type="radio"/> |

other Please indicate any other factor (not mentioned above) that you think contributed to the disappearance of the Neanderthal phenotype.

---



---



---



---



---

End of Block: Neanderthals Opinions

Start of Block: Neanderthals Actions

actionintro Below you will find the same list of factors that might have contributed to the disappearance of the Neanderthal phenotype.

For each factor, please check the factors that you have subscribed to in your own work over the last 5 years. **Check as many as apply.** If you have not subscribed to any of the factors, please check the box "I have not subscribed to any of these factors"

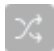



actdem *Demographic factors pertaining to Neanderthal populations (check as many as apply)*

- Inbreeding (1)
  - Stochasticity (2)
  - Population size (3)
  - Allee effects (4)
  - Other demographic factors (5)
- 

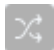

actcomp *Factors pertaining to (in)direct competition with Anatomically Modern Humans (AMHs) (check as many as apply)*

- Cognitive advantage(s) of AMHs over Neanderthals (1)
  - Technological advantage(s) of AMHs over Neanderthals (2)
  - Social advantage(s) of AMHs over Neanderthals (3)
  - Economic advantage(s) of AMHs over Neanderthals (4)
  - Morphological advantage(s) of AMHs over Neanderthals (5)
  - Other advantage(s) of AMHs over Neanderthals (6)
  - Advantages of Neanderthals over AMHs (7)
-

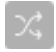

actenviron *Environmental factors affecting Neanderthal populations (check as many as apply)*

Climatic factors (1)

Epidemics (2)

Other environmental factors (3)

---

actnone

I have not subscribed to any of these factors (1)

---

actother Are there any other factors that you have subscribed to? Which ones?

---

---

---

---

---

---

Page Break

certain In the above, you have indicated the factors that you think best explain the disappearance of the Neanderthal phenotype. Please estimate your certainty regarding your explanation(s).

very uncertain1 (1)

2 (2)

3 (3)

4 (4)

5 (5)

6 (6)

very certain7 (7)

---

metaphor On a more general note, which metaphor do you think best captures the overall structure of the development of the hominin family?

Tree (1)

Bush (2)

Braided Stream (3)

---

Page Break

midtext

Thank you for your responses so far. We have just 3 short pages of questions left, plus a page containing questions about demographic information.

On the next three pages, we turn our focus to some factors affecting contemporary society. We are trying to learn more about how you see society and yourself.

### End of Block: Neanderthals Actions

---

### Start of Block: climate change

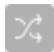

Please indicate the extent to which you agree or disagree with each of the following items about the effects of climate change. (1 = strongly disagree, 7 = strongly agree)

|                                                                         | 1<br>Strongly<br>disagree<br>(1) | 2 (2)                 | 3 (3)                 | 4 (4)                 | 5 (5)                 | 6 (6)                 | 7<br>Strongly<br>agree<br>(7) | don't<br>know<br>(8)  | Prefer<br>not<br>to<br>respond<br>(9) |
|-------------------------------------------------------------------------|----------------------------------|-----------------------|-----------------------|-----------------------|-----------------------|-----------------------|-------------------------------|-----------------------|---------------------------------------|
| MY local area is likely to be affected by climate change (1)            | <input type="radio"/>            | <input type="radio"/> | <input type="radio"/> | <input type="radio"/> | <input type="radio"/> | <input type="radio"/> | <input type="radio"/>         | <input type="radio"/> | <input type="radio"/>                 |
| Climate change will mostly affect areas that are far away from here (2) | <input type="radio"/>            | <input type="radio"/> | <input type="radio"/> | <input type="radio"/> | <input type="radio"/> | <input type="radio"/> | <input type="radio"/>         | <input type="radio"/> | <input type="radio"/>                 |
| Climate change will mostly affect developing countries (3)              | <input type="radio"/>            | <input type="radio"/> | <input type="radio"/> | <input type="radio"/> | <input type="radio"/> | <input type="radio"/> | <input type="radio"/>         | <input type="radio"/> | <input type="radio"/>                 |
| Climate change is likely to have a big impact on people like me (4)     | <input type="radio"/>            | <input type="radio"/> | <input type="radio"/> | <input type="radio"/> | <input type="radio"/> | <input type="radio"/> | <input type="radio"/>         | <input type="radio"/> | <input type="radio"/>                 |

### End of Block: climate change

Start of Block: Social dominance orientation

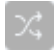

agree Describe yourself as you generally are now, not as you wish to be in the future. Describe yourself as you honestly see yourself, in relation to other people you know of the same sex as you are, and roughly your same age. Indicate for each statement whether it is accurate or inaccurate as a description of you. (1 = Very Inaccurate, 5 = Very Accurate)

|                                                        | 1<br>Very<br>Inaccurate<br>(1) | 2<br>Moderately<br>Inaccurate<br>(2) | 3<br>Neither<br>Accurate<br>Nor<br>Inaccurate<br>(3) | 4<br>Moderately<br>Accurate<br>(4) | 5<br>Very<br>Accurate<br>(5) | don't<br>know<br>(6)  | Prefer<br>not<br>to<br>respond<br>(7) |
|--------------------------------------------------------|--------------------------------|--------------------------------------|------------------------------------------------------|------------------------------------|------------------------------|-----------------------|---------------------------------------|
| I sympathize with others' feelings.<br>(1)             | <input type="radio"/>          | <input type="radio"/>                | <input type="radio"/>                                | <input type="radio"/>              | <input type="radio"/>        | <input type="radio"/> | <input type="radio"/>                 |
| I feel others' emotions.<br>(2)                        | <input type="radio"/>          | <input type="radio"/>                | <input type="radio"/>                                | <input type="radio"/>              | <input type="radio"/>        | <input type="radio"/> | <input type="radio"/>                 |
| I am not really interested in others.<br>(3)           | <input type="radio"/>          | <input type="radio"/>                | <input type="radio"/>                                | <input type="radio"/>              | <input type="radio"/>        | <input type="radio"/> | <input type="radio"/>                 |
| I am not interested in other people's problems.<br>(4) | <input type="radio"/>          | <input type="radio"/>                | <input type="radio"/>                                | <input type="radio"/>              | <input type="radio"/>        | <input type="radio"/> | <input type="radio"/>                 |

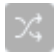

sdo Below are several ideas about society that people may support or oppose. Show how much you favor or oppose each idea below by selecting a number from 1 to 7 on the scale below. You can work quickly; your first feeling is generally the best.

|                           | 1<br>Strongly<br>disagree<br>(1) | 2 (2)                 | 3 (3)                 | 4 (4)                 | 5 (5)                 | 6 (6)                 | 7<br>Strongly<br>agree<br>(7) | don't<br>know<br>(8)  | Prefer<br>not<br>to<br>respond<br>(9) |
|---------------------------|----------------------------------|-----------------------|-----------------------|-----------------------|-----------------------|-----------------------|-------------------------------|-----------------------|---------------------------------------|
| An ideal society requires | <input type="radio"/>            | <input type="radio"/> | <input type="radio"/> | <input type="radio"/> | <input type="radio"/> | <input type="radio"/> | <input type="radio"/>         | <input type="radio"/> | <input type="radio"/>                 |

some groups to be on top and others to be on the bottom (1)

No one group should dominate in society. (2)

Group equality should not be our primary goal. (3)

We should work to give all groups an equal chance to succeed. (4)

|                       |                       |                       |                       |                       |                       |                       |                       |                       |
|-----------------------|-----------------------|-----------------------|-----------------------|-----------------------|-----------------------|-----------------------|-----------------------|-----------------------|
| <input type="radio"/> | <input type="radio"/> | <input type="radio"/> | <input type="radio"/> | <input type="radio"/> | <input type="radio"/> | <input type="radio"/> | <input type="radio"/> | <input type="radio"/> |
| <input type="radio"/> | <input type="radio"/> | <input type="radio"/> | <input type="radio"/> | <input type="radio"/> | <input type="radio"/> | <input type="radio"/> | <input type="radio"/> | <input type="radio"/> |
| <input type="radio"/> | <input type="radio"/> | <input type="radio"/> | <input type="radio"/> | <input type="radio"/> | <input type="radio"/> | <input type="radio"/> | <input type="radio"/> | <input type="radio"/> |

End of Block: Social dominance orientation

Start of Block: Speciesism

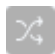

spec We would you like to know how you think about issues related to nonhuman animals. Please answer the following questions based on your own opinion. (1 = strongly disagree, 7 = strongly agree)

|                                                         | 1<br>Strongly disagree<br>(1) | 2 (2)                 | 3 (3)                 | 4 (4)                 | 5 (5)                 | 6 (6)                 | 7<br>Strongly agree<br>(7) | don't know<br>(8)     | Prefer not to respond<br>(9) |
|---------------------------------------------------------|-------------------------------|-----------------------|-----------------------|-----------------------|-----------------------|-----------------------|----------------------------|-----------------------|------------------------------|
| Morally, animals always count for less than humans. (1) | <input type="radio"/>         | <input type="radio"/> | <input type="radio"/> | <input type="radio"/> | <input type="radio"/> | <input type="radio"/> | <input type="radio"/>      | <input type="radio"/> | <input type="radio"/>        |

Humans have the right to use animals however they want to. (2)

It is morally acceptable to keep animals in circuses for human entertainment. (3)

It is morally acceptable to trade animals like possessions. (4)

It is morally acceptable to perform medical experiments on animals that we would not perform on any human. (5)

**End of Block: Speciesism**

---

**Start of Block: demographics**

demintro Thank you for answering our questions about how you see yourself and society. This is the last page of questions. Please answer the following questions about your demographics and profession.

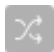

gender To which gender identity do you most identify?

- Female (1)
  - Male (2)
  - Not listed (3) \_\_\_\_\_
  - Prefer not to answer (4)
- 

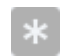

age What is your age?

\_\_\_\_\_

---

position What is your current position?

- Master student (1)
  - PhD student (2)
  - Postdoc or equivalent (3)
  - Assistant professor (non-tenure track) or equivalent (4)
  - Assistant professor (tenure track) or equivalent (5)
  - Associate professor or equivalent (6)
  - Full professor (7)
  - Other (please specify) (8)  
\_\_\_\_\_
-



familiar To what extent are you familiar with recent research in Neanderthal archaeology?

very unfamiliar1 (1)

2 (2)

3 (3)

4 (4)

very familiar5 (5)

---

subfield In which subfield(s) do you work?

Palaeoanthropology (1)

Archaeology (2)

Biochemistry & Palaeo-genetics (3)

Other (please specify) (4)

---

period Which period(s) do you specialise in?

- Lower and Middle Palaeolithic (1)
  - Lower and Middle Stone Age (2)
  - Upper Palaeolithic (3)
  - Later Stone Age (4)
  - Other (please specify) (5)
- 

nation What is your nationality?

▼ Afghanistan (1) ... Zimbabwe (196)

---

country What country do you currently work in?

▼ Afghanistan (1) ... Zimbabwe (196)

---

phdcountry What country did you receive your PhD in? If you did not receive your PhD yet, which country will you likely receive your PhD in?

▼ Afghanistan (1) ... Zimbabwe (196)

---

phdlength How long have you had your PhD?

▼ Do not have a PhD (1) ... 50 years or more (52)

**End of Block: demographics**

---

**Start of Block: End**

end Thank you for completing our study. Your responses have helped us learn more about how researchers think about Neanderthals and AMHs. We appreciate your help!

If you have any questions or concerns about this study, you may contact the lead investigator of this study: Gerrit Dusseldorp at [g.i.dusseldorp@arch.leidenuniv.nl](mailto:g.i.dusseldorp@arch.leidenuniv.nl).

By clicking the button below, you will save your data. Then, you will be redirected to a new page where you may provide your email to enter the lottery for the \$500 gift certificate.

**End of Block: End**

---
